# Supplementary material
Source: Copernicus journal article supplement (doi:10.5194/hess-30-3351-2026)
Supplement: Supplementary file 1 [file hess-30-3351-2026-supplement.pdf]

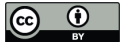

*Supplement of*

## **Regulatory role of permanent gullies in dissolved nitrogen and phosphorus transport under different rainfall types**

**Zhuoxin Chen et al.**

*Correspondence to:* Mingming Guo ([guomingming@iga.ac.cn](mailto:guomingming@iga.ac.cn))

The copyright of individual parts of the supplement might differ from the article licence.

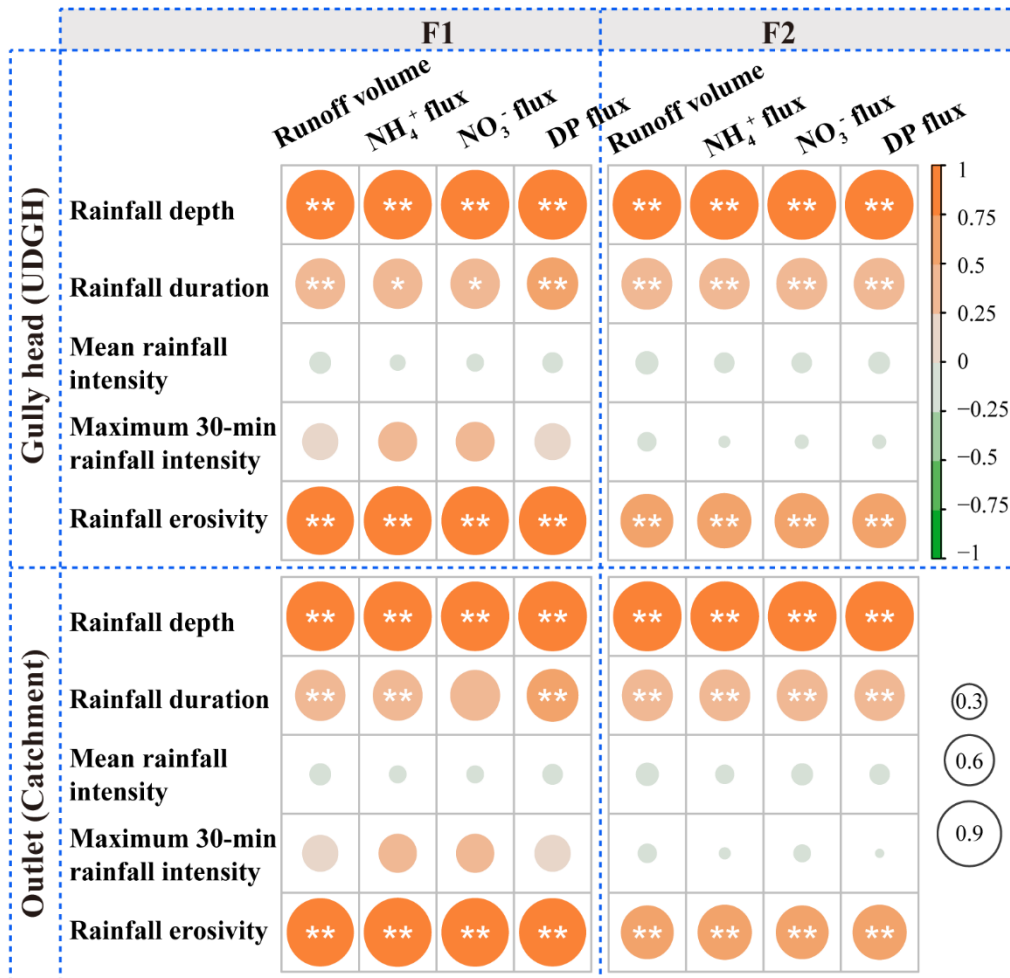

Fig. S1 Correlation analysis of rainfall characteristics with runoff and dissolved NH<sub>4</sub><sup>+</sup>, NO<sub>3</sub><sup>-</sup>, and P fluxes.

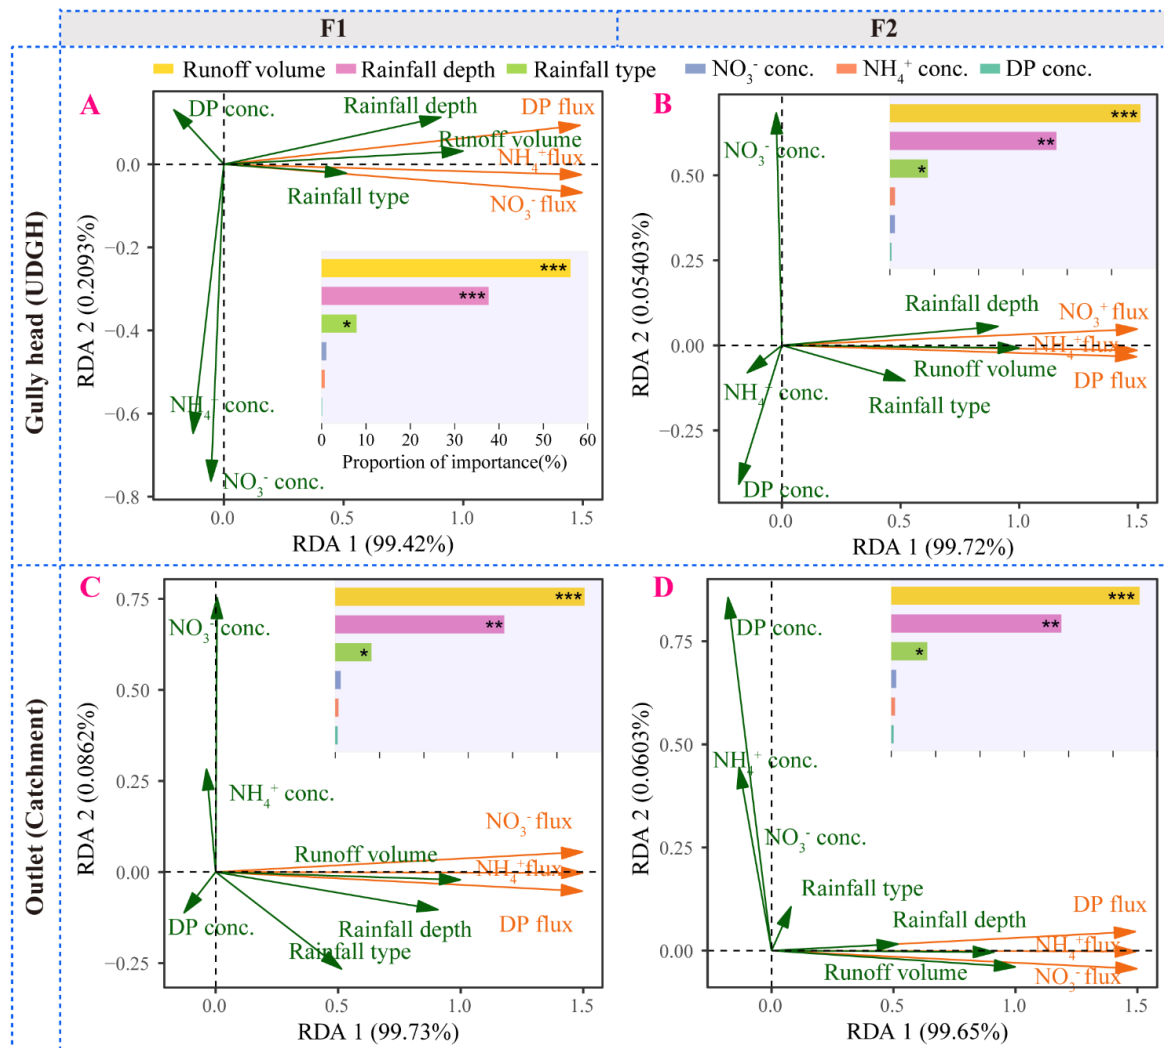

**Fig. S2** Ordination plots of redundancy analysis for the dissolved NH<sub>4</sub><sup>+</sup>, NO<sub>3</sub><sup>-</sup>, and P transport fluxes response. Variation partitioning analysis of rainfall, runoff, and dissolved nutrient concentration to variation in dissolved nutrient transport flux and individual effects of explanatory variables based on hierarchical partitioning.
